# Supplementary material for: Phosphorus modification of cobalt–iron nanoparticles embedded in a nitrogen-doped carbon network for oxygen reduction reaction
Source: Royal Society of Chemistry journal article supplement (doi:10.1039/d0ra08768h), 2021-01-01
Supplement: d0ra08768h1.pdf [file d0ra08768h1.pdf]

## Supplementary Material

# Phosphorus modification of cobalt–iron nanoparticles embedded in a nitrogen-doped carbon network for oxygen reduction reaction

Rui Zhang <sup>a</sup>, Zheng Wang <sup>a</sup>, Lin Zhu <sup>a</sup>, Weixin Lv <sup>a,\*</sup>, Wei Wang <sup>a,\*</sup>

<sup>a</sup> *School of Chemistry and Chemical Engineering, Yancheng Institute of Technology, Yancheng  
224051, China*

\*Corresponding author.

*E-mail address:* lvweixin@ycit.edu.cn (W.X. Lv), wangw@ycit.edu.cn (W. Wang).

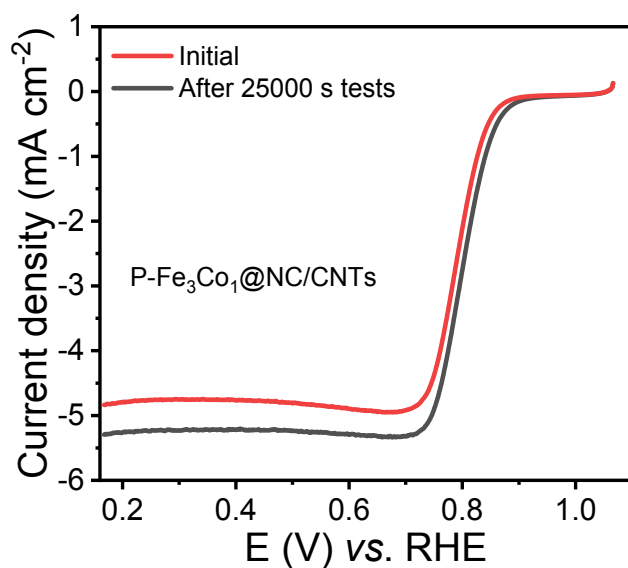

**Fig. S1.** ORR polarization curves before and after 25000s potential cycles for P-Fe<sub>3</sub>Co<sub>1</sub>@NC/CNTs catalyst.

The ORR polarization curves before and after 25000s durability evaluation at 0.6 V in an O<sub>2</sub>-saturated 0.1 M KOH solution are shown in Fig. S1. The activity of P-Fe<sub>3</sub>Co<sub>1</sub>@NC/CNTs decreased slightly after 25000s durability evaluation. This result corresponds to the durability evaluation results of Fig. S1.

The morphology of the P-FeCo@NC/CNTs on carbon paper substrate before and after discharge over 12 h are shown in Fig. S2. It can be seen that the morphology of the P-FeCo@NC/CNTs on carbon paper substrate did not change significantly before and after 12 h reaction. The Nafion ionomers protects the P-FeCo@NC/CNTs catalysts well.

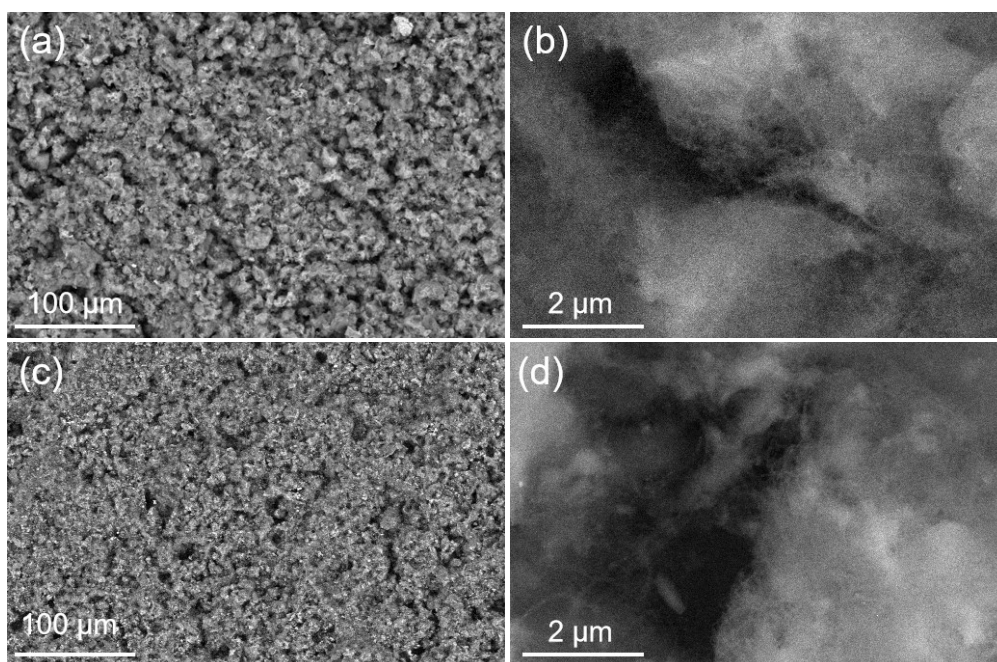

**Fig. S2** The morphology of the P-FeCo@NC/CNTs on carbon paper substrate before and after discharge over 12 h.

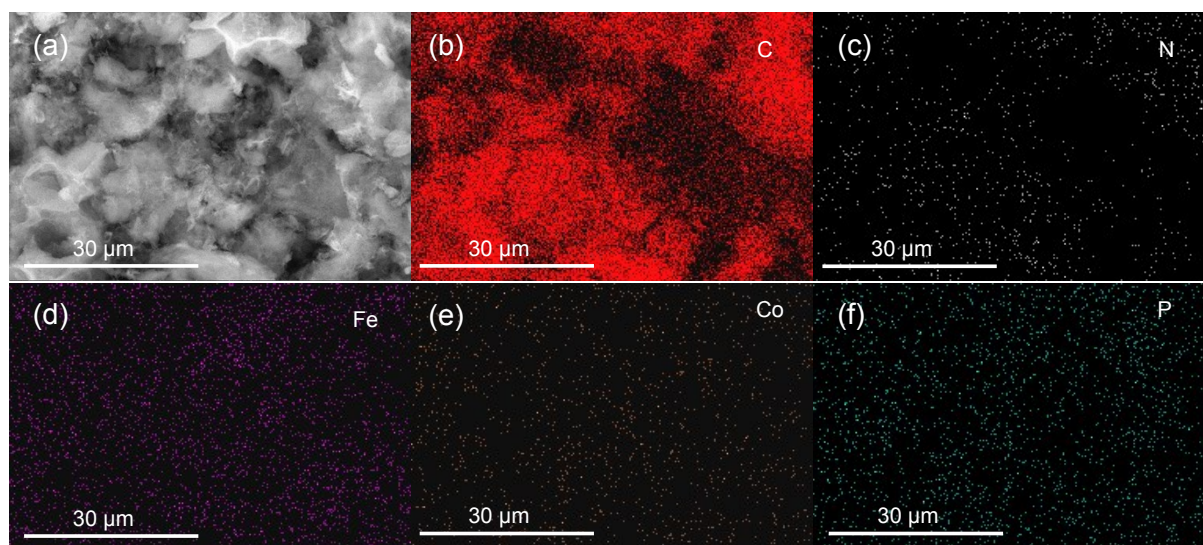

**Fig. S3** SEM image and corresponding elemental mapping of C, N, Fe, Co and P of P-FeCo@NC/CNTs.

The EDS mapping of C, N, Fe, Co and P elements evenly distributed across the whole structures of P-FeCo@NC/CNTs on carbon paper substrate.

**Table S1.** Comparison of the catalytic performances of the P-FeCo@NC/CNTs prepared herein and other electrocatalysts reported in literature.

| Catalyst                                   | Loading<br>(mg cm <sup>-2</sup> ) | onset potential<br>(V vs. RHE) | half-wave Potential<br>(V vs. RHE) | limiting current<br>Density (mA cm <sup>-2</sup> ) | Reference                                                 |
|--------------------------------------------|-----------------------------------|--------------------------------|------------------------------------|----------------------------------------------------|-----------------------------------------------------------|
| P-Fe <sub>3</sub> Co <sub>1</sub> @NC/CNTs | ~0.4                              | 0.86                           | 0.802                              | 5.29                                               | <b>This work</b>                                          |
| FeCo-N-C                                   | ~0.255                            | 0.967                          | 0.816                              | 4.86                                               | <i>Chemcatchem</i> , 2020, <b>12</b> , 5780-5788.         |
| Fe-N-C                                     | 0.38                              | 0.98                           | 0.831                              | 4.2                                                | <i>Mater. Res. Express</i> , 2020, <b>7</b> , 025506.     |
| FeCo@NC-750                                | 0.8                               | 0.94                           | 0.8                                | 4.82                                               | <i>Adv. Mater. Interfaces</i> , 2018, <b>5</b> , 1701448. |
| FeCoNi/N-CNTs                              | ~0.4                              | 0.811                          | 0.749                              | 5.28                                               | <i>J. Alloys Compd</i> , 2021, <b>857</b> , 158249.       |
| FeP@SA-Fe/HC-900                           | ~0.5                              | 0.941                          | 0.843                              | ~6.1                                               | <i>J. Coll. Interf. Sci</i> , 2021, <b>583</b> , 371-375. |
| FeCu-N/C                                   | ~1.0                              | 1.055                          | 0.865                              | 6.06                                               | <i>J. Alloys Compd</i> , 2021, <b>826</b> , 154152.       |
